# Supplementary material for: Modification of the surface chemistry of single- and multi-walled carbon nanotubes by HNO3 and H2SO4 hydrothermal oxidation for application in direct contact membrane distillation
Source: Royal Society of Chemistry journal article supplement (doi:10.1039/c4cp00615a), 2014-01-01
Supplement: c4cp00615a1.pdf [file c4cp00615a1.pdf]

## Supporting Information

### **Modification of the surface chemistry of single- and multi-walled carbon nanotubes by HNO<sub>3</sub> and H<sub>2</sub>SO<sub>4</sub> hydrothermal oxidation for application in direct contact membrane distillation**

Sergio Morales-Torres, Tânia L.S. Silva, Luisa M. Pastrana-Martínez, Ana T.S.C. Brandão,  
José L. Figueiredo, Adrián M.T. Silva\*

*LCM - Laboratory of Catalysis and Materials - Associate Laboratory LSRE/LCM, Faculdade de Engenharia, Universidade do Porto, Rua Dr. Roberto Frias, 4200-465 Porto, Portugal.*

\*Corresponding author e-mail address: [adrian@fe.up.pt](mailto:adrian@fe.up.pt) (A.M.T. Silva)

**Table S1.** Results obtained from the deconvolution of CO<sub>2</sub> TPD spectra for the CNTs treated with different oxidizing agents at 0.30 mol L<sup>-1</sup>.  $T_M$ ,  $W$  and  $A$  correspond to the temperature, half-height and area of the peak, respectively.  $P_{\#x}$  is the percentage of the area of the peak  $\#x$  with respect to the total area of the spectrum.

| Sample       | Peak #1      |            |                                   |                  | Peak #2      |            |                                   |                  |                    | Peak #3      |            |                                   |                  | Peak #4      |            |                                   |                  |
|--------------|--------------|------------|-----------------------------------|------------------|--------------|------------|-----------------------------------|------------------|--------------------|--------------|------------|-----------------------------------|------------------|--------------|------------|-----------------------------------|------------------|
|              | $T_M$<br>(K) | $W$<br>(K) | $A$<br>( $\mu\text{mol g}^{-1}$ ) | $P_{\#1}$<br>(%) | $T_M$<br>(K) | $W$<br>(K) | $A$<br>( $\mu\text{mol g}^{-1}$ ) | $P_{\#2}$<br>(%) | $P_{\#1+2}$<br>(%) | $T_M$<br>(K) | $W$<br>(K) | $A$<br>( $\mu\text{mol g}^{-1}$ ) | $P_{\#3}$<br>(%) | $T_M$<br>(K) | $W$<br>(K) | $A$<br>( $\mu\text{mol g}^{-1}$ ) | $P_{\#4}$<br>(%) |
| MW-HN-0.30   | 536          | 94         | 443                               | 36               | 644          | 100        | 206                               | 17               | 53                 | 762          | 138        | 214                               | 18               | 920          | 138        | 354                               | 29               |
| MW-HS-0.30   | 542          | 95         | 148                               | 31               | 630          | 78         | 65                                | 14               | 45                 | 738          | 170        | 130                               | 28               | 942          | 170        | 128                               | 27               |
| SW/S-HN-0.30 | 529          | 99         | 300                               | 42               | 656          | 107        | 147                               | 20               | 62                 | 797          | 127        | 102                               | 14               | 933          | 127        | 177                               | 24               |
| SW/S-HS-0.30 | 534          | 147        | 150                               | 43               | 656          | 80         | 25                                | 7                | 50                 | 766          | 162        | 73                                | 21               | 950          | 162        | 99                                | 29               |
| SW/L-HN-0.30 | 532          | 115        | 238                               | 40               | 650          | 101        | 77                                | 13               | 53                 | 753          | 156        | 105                               | 17               | 926          | 156        | 180                               | 30               |
| SW/L-HS-0.30 | 547          | 124        | 159                               | 41               | 665          | 78         | 36                                | 9                | 50                 | 762          | 143        | 84                                | 22               | 961          | 143        | 106                               | 28               |

**Table S2.** Results obtained from the deconvolution of CO TPD spectra for the CNTs treated with different oxidizing agents at 0.30 mol L<sup>-1</sup>.  $T_M$ ,  $W$  and  $A$  correspond to the temperature, half-height and area of the peak, respectively.  $P_{\#x}$  is the percentage of the area of the peak  $\#x$  with respect to the total area of the spectrum.

| Sample       | Peak #1 & #2 |            |                                   |                      | Peak #3      |            |                                   |                  | Peak #4      |            |                                   |                  | Peak #5 & #6 |            |                                   |                      |
|--------------|--------------|------------|-----------------------------------|----------------------|--------------|------------|-----------------------------------|------------------|--------------|------------|-----------------------------------|------------------|--------------|------------|-----------------------------------|----------------------|
|              | $T_M$<br>(K) | $W$<br>(K) | $A$<br>( $\mu\text{mol g}^{-1}$ ) | $P_{\#1+\#2}$<br>(%) | $T_M$<br>(K) | $W$<br>(K) | $A$<br>( $\mu\text{mol g}^{-1}$ ) | $P_{\#3}$<br>(%) | $T_M$<br>(K) | $W$<br>(K) | $A$<br>( $\mu\text{mol g}^{-1}$ ) | $P_{\#4}$<br>(%) | $T_M$<br>(K) | $W$<br>(K) | $A$<br>( $\mu\text{mol g}^{-1}$ ) | $P_{\#5+\#6}$<br>(%) |
| MW-HN-0.30   | 536          | 94         | 23                                | 1                    | 762          | 138        | 214                               | 6                | 987          | 161        | 2927                              | 88               | 1146         | 161        | 157                               | 5                    |
|              | 644          | 100        | 15                                |                      |              |            |                                   |                  |              |            |                                   |                  |              |            |                                   |                      |
| MW-HS-0.30   | 542          | 95         | 22                                | 2                    | 738          | 170        | 130                               | 10               | 936          | 189        | 614                               | 47               | 1099         | 189        | 532                               | 41                   |
|              | 630          | 78         | 13                                |                      |              |            |                                   |                  |              |            |                                   |                  |              |            |                                   |                      |
| SW/S-HN-0.30 | 529          | 99         | 28                                | 4                    | 797          | 127        | 102                               | 4                | 991          | 142        | 1878                              | 74               | 1178         | 142        | 291                               | 18                   |
|              | 656          | 107        | 72                                |                      |              |            |                                   |                  |              |            |                                   |                  | 1370         | 179        | 158                               |                      |
| SW/S-HS-0.30 | 534          | 147        | 6.5                               | 3                    | 766          | 162        | 73                                | 6                | 984          | 218        | 860                               | 76               | 1177         | 218        | 169                               | 15                   |
|              | 656          | 80         | 25                                |                      |              |            |                                   |                  |              |            |                                   |                  |              |            |                                   |                      |
| SW/L-HN-0.30 | 532          | 115        | 46                                | 4                    | 753          | 156        | 105                               | 7                | 978          | 175        | 1000                              | 62               | 1116         | 175        | 372                               | 27                   |
|              | 650          | 101        | 13                                |                      |              |            |                                   |                  |              |            |                                   |                  | 1356         | 119        | 66                                |                      |
| SW/L-HS-0.30 | 547          | 124        | 7.3                               | 7                    | 762          | 143        | 84                                | 10               | 959          | 148        | 488                               | 56               | 1129         | 148        | 237                               | 27                   |
|              | 665          | 78         | 51                                |                      |              |            |                                   |                  |              |            |                                   |                  |              |            |                                   |                      |

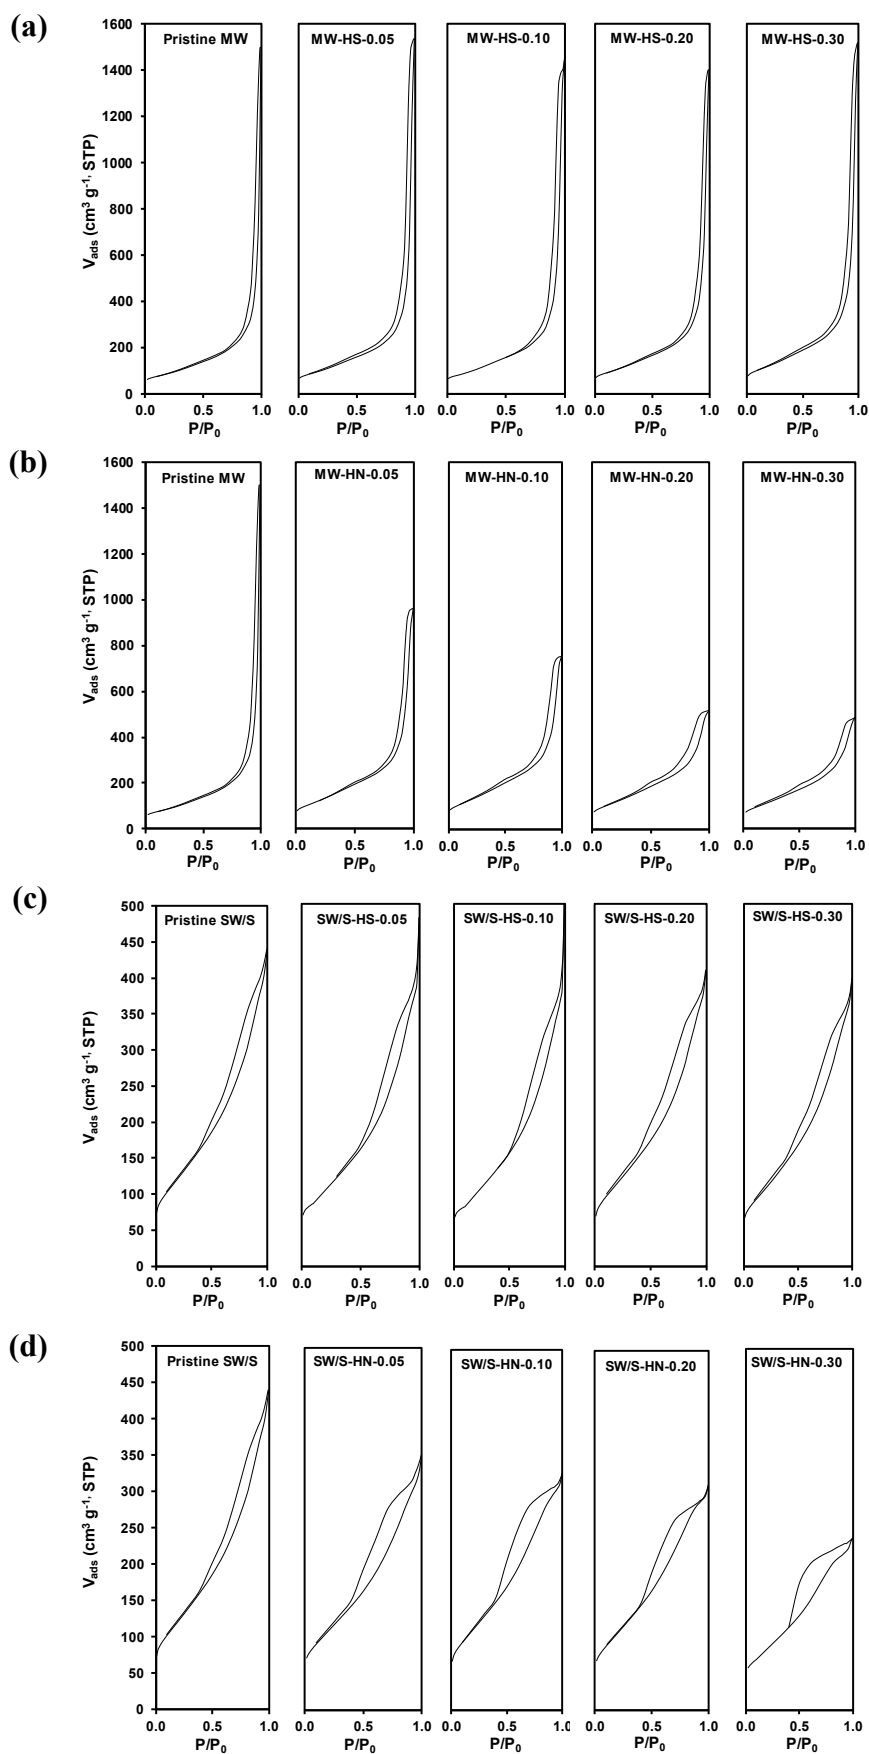

**Figure S1.** Nitrogen adsorption-desorption isotherms at 77 K for (a, b) MW and (c, d) SW/S treated with different (a, c)  $\text{H}_2\text{SO}_4$  or (b, d)  $\text{HNO}_3$  concentrations.

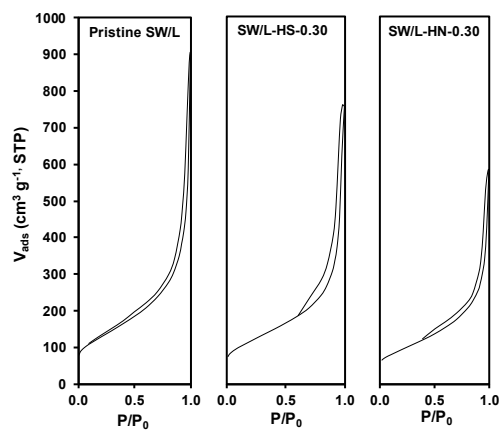

**Figure S2.** Nitrogen adsorption-desorption isotherms at 77 K for pristine SW/L and treated with  $\text{H}_2\text{SO}_4$  or  $\text{HNO}_3$  at  $0.30 \text{ mol L}^{-1}$  concentration.

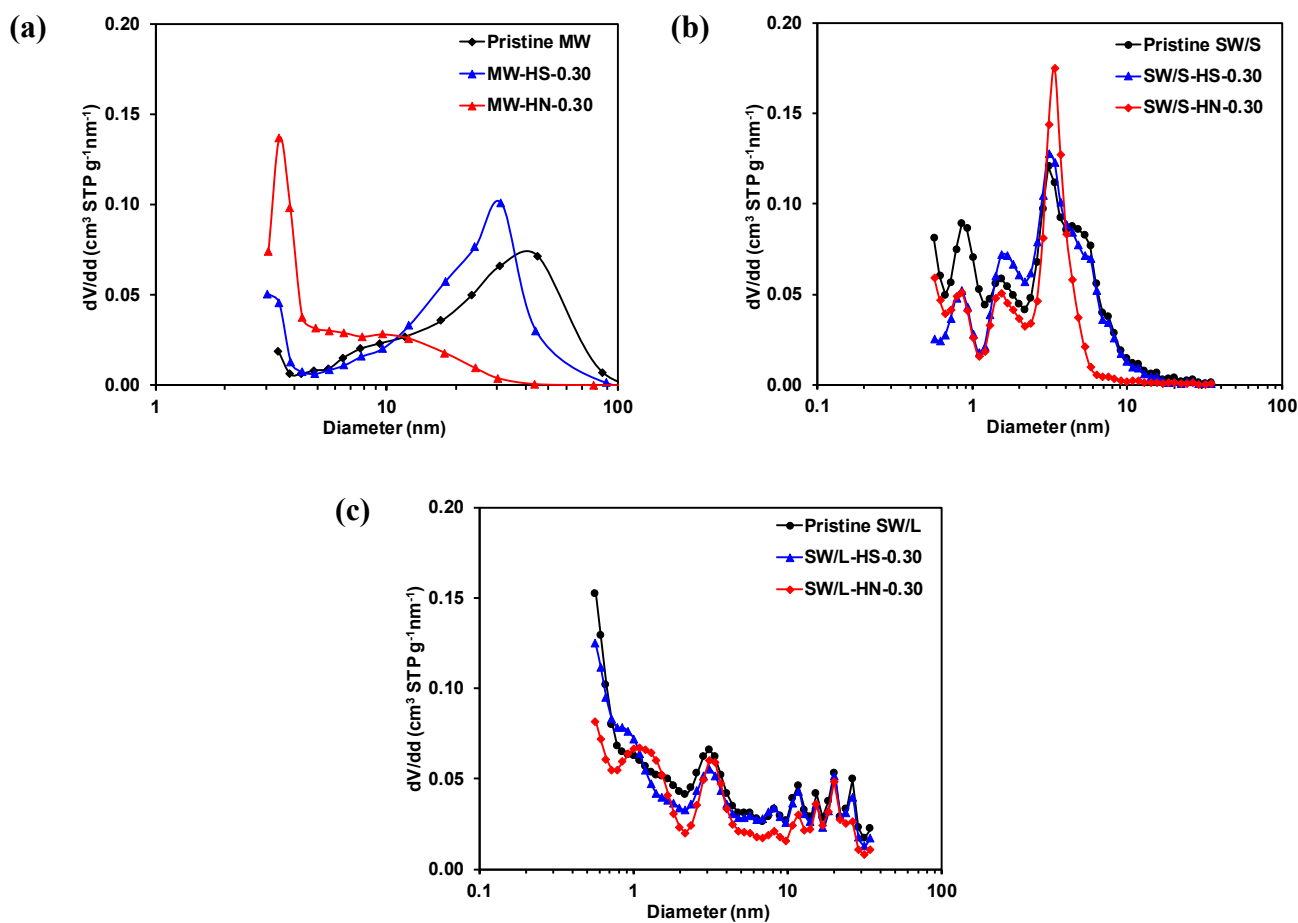

**Figure S3.** Pore size distributions for (a) pristine MW, (b) pristine SW/S and (c) pristine SW/L and, respectively, for samples treated with  $\text{H}_2\text{SO}_4$  or  $\text{HNO}_3$  at  $0.30 \text{ mol L}^{-1}$ . PSDs obtained by (a) BJH or (b, c) QSDFT methods.
